# Supplementary material
Source: PubMed Central journal article supplement (PMC7246040)
Supplement: NIHMS1567936-supplement-fig_1.pdf [file NIHMS1567936-supplement-fig_1.pdf]

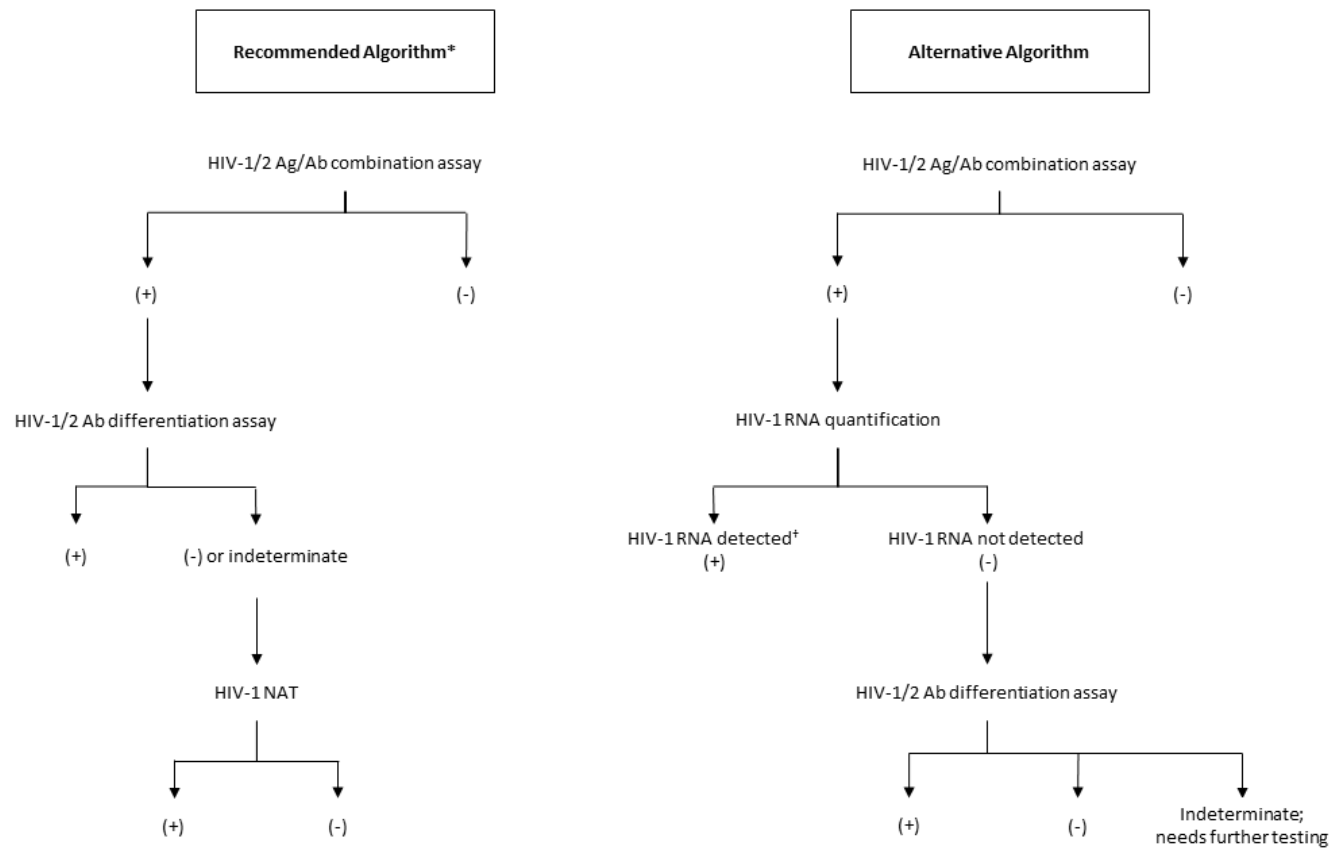

**Supplemental Figure 1.** CDC/APHL Recommended Laboratory HIV Diagnostic Testing Algorithm and Alternative Laboratory HIV Diagnostic Testing Algorithm Using HIV-1 RNA Viral Load.

Abbreviations: HIV, human immunodeficiency virus; Ag, antigen; Ab, antibody; (+), positive; (-), negative; RNA, ribonucleic acid; NAT, nucleic acid test.

\* Centers for Disease Control and Prevention and Association of Public Health Laboratories. Laboratory Testing for the Diagnosis of HIV Infection: Updated Recommendations. Available at <http://dx.doi.org/10.15620/cdc.23447>. Published June 27, 2014. Accessed June 10, 2019.

Centers for Disease Control and Prevention. 2018 Quick reference guide: recommended laboratory HIV testing algorithm for serum or plasma specimens. Available at <https://stacks.cdc.gov/view/cdc/50872>. Published Jan 2018. Accessed Oct. 7, 2019.

† quantifiable or < limit of quantification (LOQ) or >LOQ
