# Supplementary material
Source: PubMed Central journal article supplement (PMC7246040)
Supplement: NIHMS1567936-supplement-fig_2.pdf [file NIHMS1567936-supplement-fig_2.pdf]

Supplemental Figure 2. Viral Loads Detected by the Roche COBAS AmpliPrep/COBAS TaqMan HIV-1 Test v2.0 and Hologic Aptima HIV-1 Quant Assay Among 113 Specimens with Reactive Antigen/Antibody Screening Results.

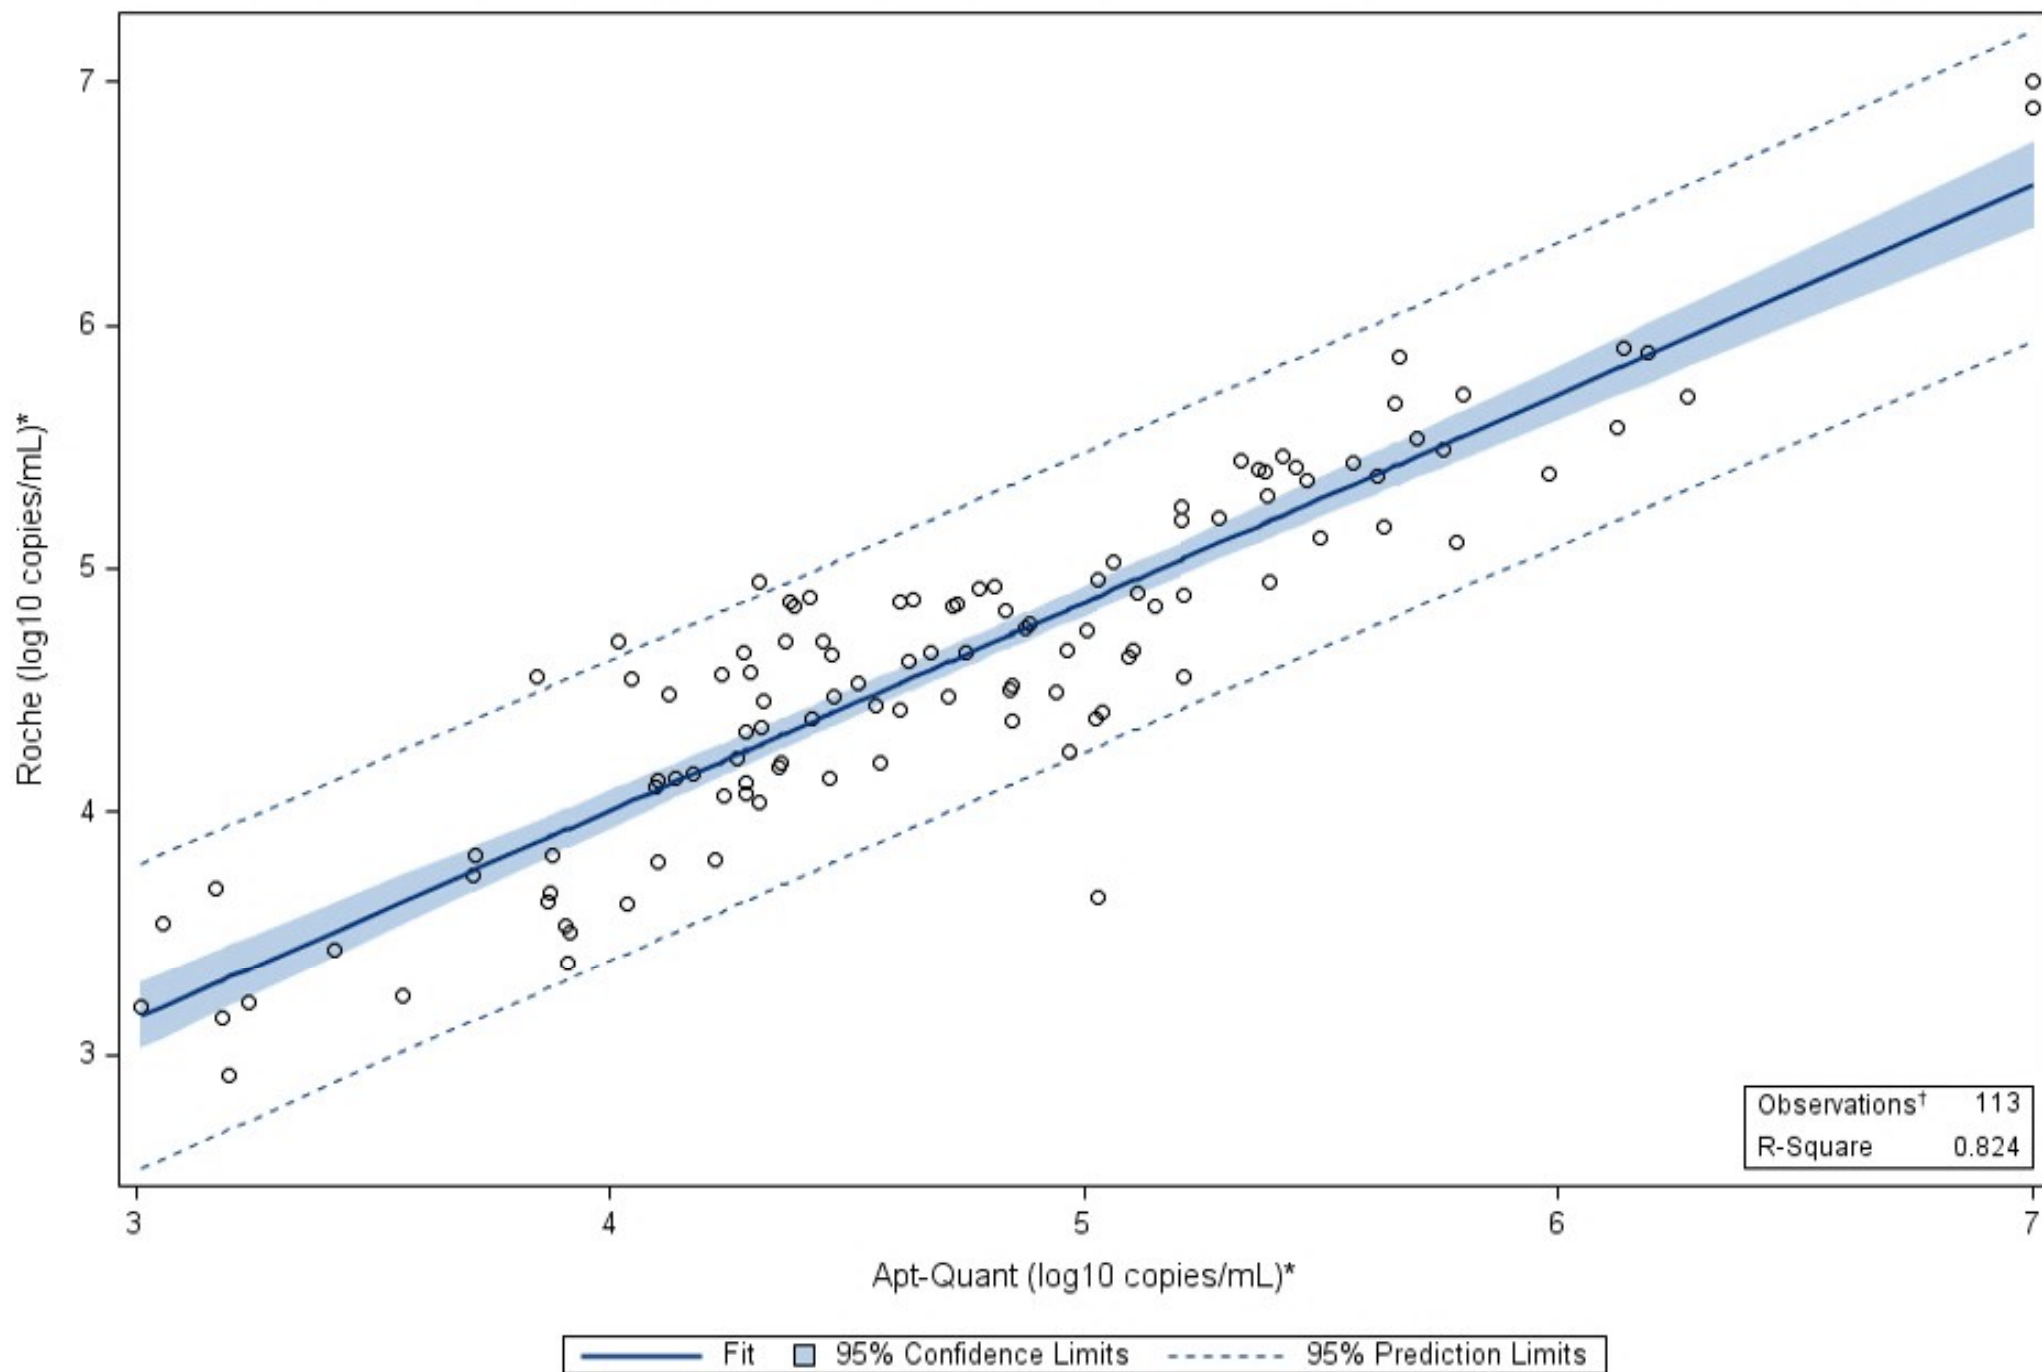

\*Roche COBAS AmpliPrep/COBAS TaqMan HIV-1 Test v2.0 performed using a 1:5 dilution protocol with 100µl of plasma; Hologic Aptima HIV-1 Quant Assay performed using a 1:7 dilution protocol with 100µl of plasma

<sup>†</sup>X and Y axes truncated where no data exist. Two specimens had viral loads greater than the upper limit of quantification; all others quantified.
