# Supplementary material
Source: PubMed Central journal article supplement (PMC7246040)
Supplement: NIHMS1567936-supplement-fig_3.pdf [file NIHMS1567936-supplement-fig_3.pdf]

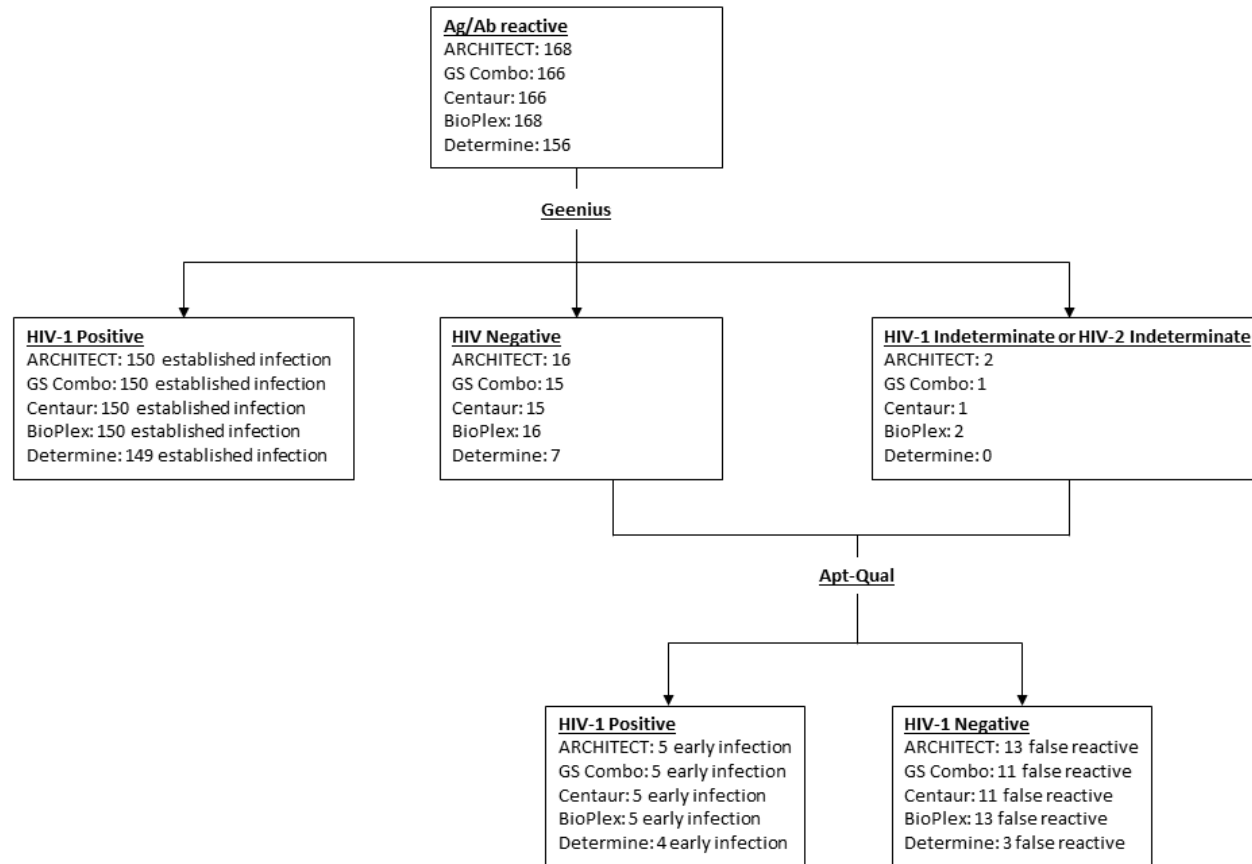

**Supplemental Figure 3a.** Outcomes of recommended algorithm for 193 specimens reactive on  $\geq 1$  Ag/Ab screening test.

Abbreviations: HIV, human immunodeficiency virus; Ag, antigen; Ab, antibody; Apt-Qual, Gen-Probe Aptima HIV-1 RNA Qualitative Assay.

Note: All 193 specimens were reactive on at least one Ag/Ab screening test. Specimens with reactive Ag/Ab, negative or indeterminate Geenius, and reactive Aptima HIV-1 RNA Qualitative Assay results were classified as “early infection.” Specimens with reactive Ag/Ab and HIV-1 positive Geenius results were classified as “established infection.” Specimens with reactive Ag/Ab, negative or indeterminate Geenius, and nonreactive Aptima HIV-1 RNA Qualitative Assay results were classified as “false reactive” on an Ag/Ab screening test.

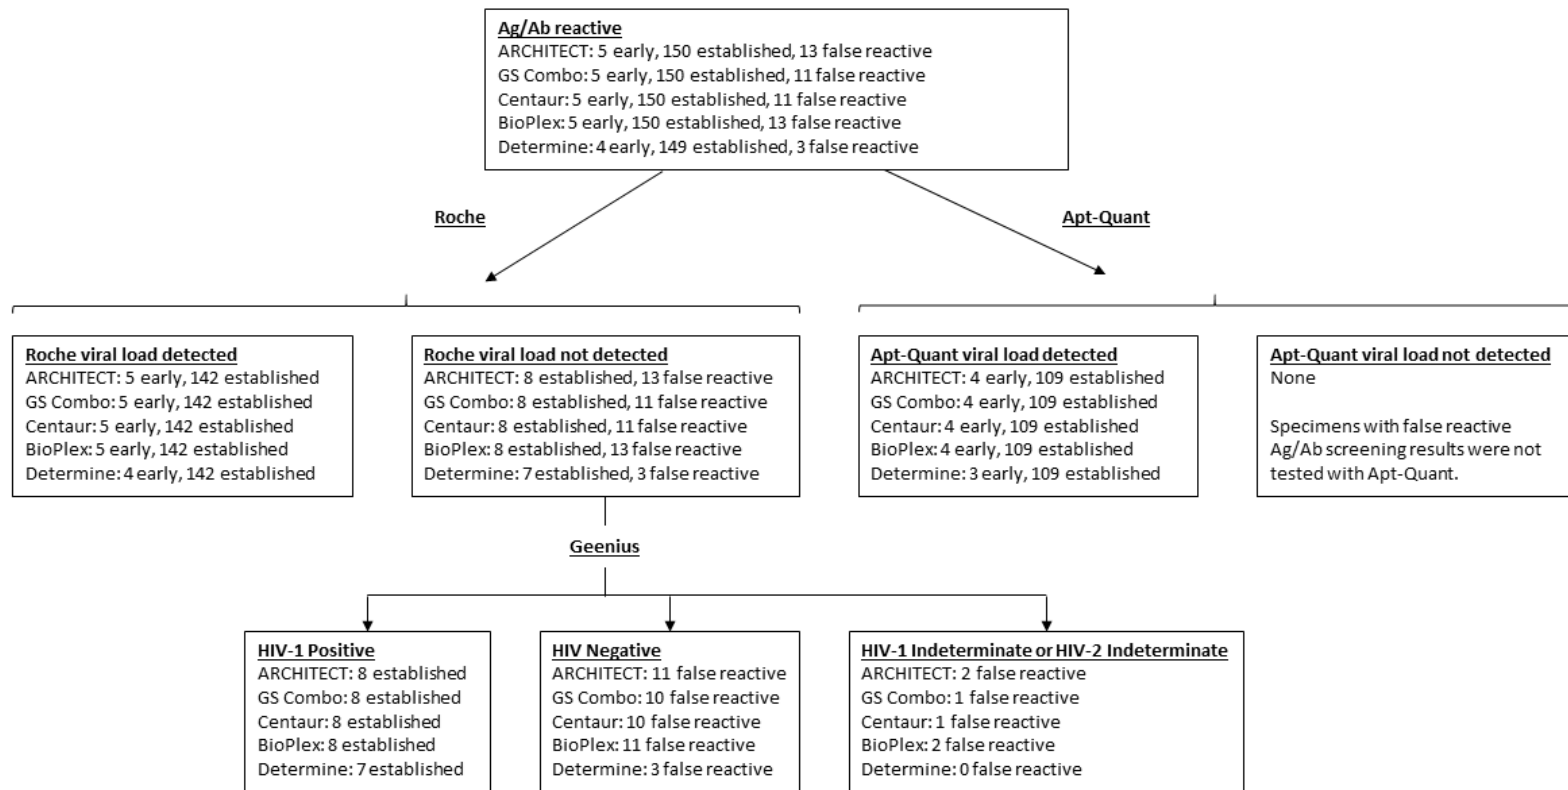

**Supplemental Figure 3b.** Outcomes of alternative algorithm for 193 recommended algorithm-defined positive and false-positive specimens by individual screening test and infection category.

Abbreviations: HIV, human immunodeficiency virus; Ag, antigen; Ab, antibody; Roche, Roche COBAS AmpliPrep/ COBAS TaqMan HIV-1 Test; Apt-Quant, Hologic Aptima HIV-1 Quant Assay.

Note: All 193 specimens were reactive on at least one Ag/Ab screening test. Results from the recommended algorithm were used to define specimens as “early infection,” “established infection,” or “false reactive.”
