# Supplementary material
Source: PubMed Central journal article supplement (PMC7246040)
Supplement: NIHMS1567936-supplement-table_1.pdf [file NIHMS1567936-supplement-table_1.pdf]

**Supplemental Table 1.** Test Results from 8 Recommended Algorithm-Defined HIV-Positive Specimens with Undetectable Viral

Load\*

| <b>Specimen No.</b> | <b>ARC (S/CO)</b> | <b>GS (S/CO)</b> | <b>CHIV (S/CO)</b> | <b>BPC (index)</b> | <b>DC (Ag/Ab)</b> | <b>Geenius interpretation</b> | <b>Geenius bands</b>            | <b>Apt-Qual</b> |
|---------------------|-------------------|------------------|--------------------|--------------------|-------------------|-------------------------------|---------------------------------|-----------------|
| 1                   | 275               | 15.2             | 12.0               | >200               | Ag neg/<br>Ab pos | HIV-1 Positive                | gp160, gp41                     | Positive        |
| 2                   | 523               | 15.4             | 12.0               | >200               | Ag neg/<br>Ab pos | HIV-1 Positive                | gp140, p31, gp160, p24,<br>gp41 | Positive        |
| 3                   | 460               | 15.5             | 12.0               | >200               | Ag neg/<br>Ab pos | HIV-1 Positive                | gp160, gp41                     | Negative        |
| 4                   | 373               | 15.6             | 12.0               | >200               | Ag neg/<br>Ab pos | HIV-1 Positive                | gp160, gp41                     | Negative        |
| 5                   | 242               | 15.2             | 12.0               | >200               | Ag neg/<br>Ab pos | HIV-1 Positive                | p31, gp160, p24, gp41           | Negative        |
| 6                   | 297               | 15.6             | 12.0               | >200               | Ag neg/<br>Ab pos | HIV-1 Positive                | p31, gp160, p24, gp41           | Negative        |
| 7                   | 91.9              | 15.4             | 12.0               | >200               | Ag neg/<br>Ab pos | HIV-1 Positive                | gp160, gp41                     | Positive        |
| 8                   | 25.2              | 15.4             | 12.0               | 99.9               | Ag neg/<br>Ab neg | HIV-1 Positive                | gp160, p24, gp41                | Negative        |

Abbreviations: ARC, Abbott ARCHITECT HIV Ag/Ab Combo; GS, Bio-Rad GS HIV Combo Ag/Ab EIA; CHIV, Siemens ADVIA Centaur HIV Ag/Ab Combo; BPC, Bio-Rad BioPlex 2200 HIV Ag-Ab; DC, Alere Determine HIV-1/2 Ag/Ab Combo; S/CO, signal to cutoff value; Apt-Qual, Aptima HIV-1 RNA Qualitative Assay.

\*Roche COBAS AmpliPrep/ COBAS TaqMan HIV-1 Test v2.0 used in off-label 1:5 dilution protocol with 100  $\mu$ L of plasma. These specimens were not tested with the Aptima HIV-1 Quant Assay.
