# Supplementary material
Source: PubMed Central journal article supplement (PMC7246040)
Supplement: NIHMS1567936-supplement-table_2.pdf [file NIHMS1567936-supplement-table_2.pdf]

**Supplemental Table 2.** Test Results from 38 Recommended Algorithm-Defined Ag/Ab False-Reactive Specimens.

| Specimen No. | ARC (S/CO) | GS (S/CO) | CHIV (S/CO) | BPC (Index) | DC (Ag/Ab)    | Geenius interpretation v1.1      | Repeat Geenius interpretation v1.1 | Apt-Qual | 1:5 Roche VL* |
|--------------|------------|-----------|-------------|-------------|---------------|----------------------------------|------------------------------------|----------|---------------|
| 1            | 11.6       | 6.76      | 12.0        | 163         | Ag neg/Ab neg | HIV-1 Indeterminate              | n/d                                | Negative | TND           |
| 2            | 8.92       | 13.0      | 12.0        | 24.9        | Ag neg/Ab pos | HIV Negative                     | HIV Negative                       | Negative | TND           |
| 3            | 3.68       | 0.285     | 0.0771      | 0.03        | Ag neg/Ab neg | HIV-2 Indeterminate <sup>†</sup> | HIV-2 Indeterminate <sup>†</sup>   | Negative | TND           |
| 4            | 3.54       | 0.245     | 0.0645      | 0.06        | Ag neg/Ab neg | HIV Negative                     | HIV Negative                       | Negative | TND           |
| 5            | 3.44       | 8.73      | 0.441       | 0.33        | Ag neg/Ab neg | HIV Negative                     | HIV Negative                       | Negative | TND           |
| 6            | 2.42       | 0.321     | 0.0679      | 0.07        | Ag neg/Ab neg | HIV-2 Indeterminate <sup>†</sup> | HIV Negative                       | Negative | TND           |
| 7            | 2.00       | 0.202     | 0.0493      | 0.11        | Ag neg/Ab neg | HIV Negative                     | HIV Negative                       | Negative | TND           |
| 8            | 1.89       | 0.514     | 0.990       | 0.7         | Ag neg/Ab neg | HIV Negative                     | n/d                                | Negative | TND           |
| 9            | 1.77       | 0.204     | 0           | 0.08        | Ag neg/Ab neg | HIV Negative                     | HIV Negative                       | Negative | TND           |
| 10           | 1.64       | 0.175     | 0.102       | 0.04        | Ag neg/Ab neg | HIV Negative                     | HIV Negative                       | Negative | TND           |
| 11           | 1.43       | 0.195     | 0.0653      | 0.07        | Ag neg/Ab neg | HIV Negative                     | HIV Negative                       | Negative | TND           |
| 12           | 1.12       | 0.211     | 0.0403      | 0.1         | Ag neg/Ab neg | HIV-2 Indeterminate <sup>†</sup> | HIV Negative                       | Negative | TND           |
| 13           | 1.05       | 0.242     | 0.0688      | 0.05        | Ag neg/Ab neg | HIV Negative                     | HIV Negative                       | Negative | TND           |
| 14           | 0.566      | 1.35      | 0           | 0.1         | Ag neg/Ab neg | HIV Negative                     | n/d                                | Negative | TND           |
| 15           | 0.521      | 1.60      | 0.159       | 0.06        | Ag neg/Ab neg | HIV Negative                     | n/d                                | Negative | TND           |
| 16           | 0.313      | 0.1       | 1.05        | 0.22        | Ag neg/Ab neg | HIV Negative                     | n/d                                | Negative | TND           |
| 17           | 0.229      | 0.1       | 2.07        | 3.49        | Ag neg/Ab neg | HIV Negative                     | n/d                                | Negative | TND           |
| 18           | 0.183      | 0.1       | 3.31        | 0.06        | Ag neg/Ab neg | HIV Negative                     | n/d                                | Negative | TND           |
| 19           | 0.169      | 1.2       | 0.0865      | 0.09        | Ag neg/Ab neg | HIV Negative                     | n/d                                | Negative | TND           |
| 20           | 0.168      | 0.1       | 1.14        | 0.07        | Ag neg/Ab neg | HIV Negative                     | n/d                                | Negative | TND           |
| 21           | 0.167      | 0.19      | 1.95        | 0.1         | Ag pos/Ab pos | HIV Negative                     | HIV Negative                       | Negative | TND           |
| 22           | 0.158      | 14.6      | 0.0789      | 0.05        | Ag neg/Ab neg | HIV Negative                     | n/d                                | Negative | TND           |
| 23           | 0.153      | 0.1       | 0.168       | 8.5         | Ag neg/Ab neg | HIV Negative                     | n/d                                | Negative | TND           |
| 24           | 0.134      | 15.6      | 0.097       | 0.08        | Ag neg/Ab neg | HIV Negative                     | n/d                                | Negative | TND           |

|           |               |             |               |             |                      |                        |              |                 |            |
|-----------|---------------|-------------|---------------|-------------|----------------------|------------------------|--------------|-----------------|------------|
| 25        | 0.115         | 0.405       | 0.0587        | 7.15        | Ag neg/Ab neg        | HIV Negative           | n/d          | Negative        | TND        |
| 26        | 0.107         | 0.1         | 1.00          | 0.15        | Ag neg/Ab neg        | HIV Negative           | n/d          | Negative        | TND        |
| 27        | 0.107         | 0.1         | 0             | 17.4        | Ag neg/Ab neg        | HIV-2<br>Indeterminate | n/d          | Negative        | TND        |
| 28        | 0.107         | 0.1         | 0.127         | 1.24        | Ag neg/Ab neg        | HIV Negative           | n/d          | Negative        | TND        |
| 29        | 0.106         | 0.1         | 1.63          | 0.57        | Ag neg/Ab neg        | HIV Negative           | n/d          | Negative        | TND        |
| <b>30</b> | <b>0.103</b>  | <b>0.1</b>  | <b>1.59</b>   | <b>4.21</b> | <b>Ag neg/Ab neg</b> | <b>HIV Negative</b>    | <b>n/d</b>   | <b>Negative</b> | <b>TND</b> |
| 31        | 0.0986        | 15.6        | 0.242         | 0.05        | Ag neg/Ab neg        | HIV Negative           | n/d          | Negative        | TND        |
| 32        | 0.0983        | 0.272       | 0.217         | 1.6         | Ag neg/Ab neg        | HIV Negative           | HIV Negative | Negative        | TND        |
| <b>33</b> | <b>0.0862</b> | <b>1.64</b> | <b>0.875</b>  | <b>1.75</b> | <b>Ag neg/Ab neg</b> | <b>HIV Negative</b>    | <b>n/d</b>   | <b>Negative</b> | <b>TND</b> |
| 34        | 0.0758        | 0.1         | 0.0807        | >200        | Ag neg/Ab neg        | HIV Negative           | n/d          | Negative        | TND        |
| <b>35</b> | <b>0.0741</b> | <b>1.16</b> | <b>0.0852</b> | <b>0.01</b> | <b>Ag neg/Ab pos</b> | <b>HIV Negative</b>    | <b>n/d</b>   | <b>Negative</b> | <b>TND</b> |
| 36        | 0.0695        | 0.219       | 0.0369        | 56.6        | Ag neg/Ab neg        | HIV Negative           | n/d          | Negative        | TND        |
| 37        | 0.0623        | 0.1         | 1.97          | 0.1         | Ag neg/Ab neg        | HIV Negative           | n/d          | Negative        | TND        |
| 38        | 0.0595        | 0.1         | 0.0929        | 4.65        | Ag neg/Ab neg        | HIV Negative           | n/d          | Negative        | TND        |

Abbreviations: ARC, Abbott ARCHITECT HIV Ag/Ab Combo; GS, Bio-Rad GS HIV Combo Ag/Ab EIA; CHIV, Siemens ADVIA Centaur HIV Ag/Ab Combo; BPC, Bio-Rad BioPlex 2200 HIV Ag-Ab; DC, Alere Determine HIV-1/2 Ag/Ab Combo; S/CO, signal to cutoff value; Apt-Qual, Aptima HIV-1 RNA Qualitative Assay; Roche, Roche COBAS AmpliPrep/ COBAS TaqMan HIV-1 Test; TND, target not detected; n/d, not done.

Bold text indicates specimen had false-reactive Ag/Ab results on more than 1 Ag/Ab test.

Note: only the initially reactive Ag/Ab screening results were used in this analysis because repeated Ag/Ab testing of initially reactive specimens was not performed for every specimen. Repeated Geenius tests are displayed for the subset of specimens for which the repeated test was done.

\*Roche viral load assay performed with off-label 1:5 dilution protocol; limit of detection (LOD) not measured.

† gp140 band only
